# Supplementary material for: Economic analysis of the health impacts of housing improvement studies: a systematic review
Source: PubMed Central journal article supplement — J Epidemiol Community Health. 2013 Aug 8;67(10):835–45. doi: 10.1136/jech-2012-202124 (PMC3786632; doi:10.1136/jech-2012-202124), 2013-08-08
Supplement: jech-2012-202124-s1.pdf [file jech-2012-202124-s1.pdf]

**Web Table 1: Summary of housing improvement studies which reported cost data only and no economic evaluation (ordered by study quality, study design & date)**

| Author, date, location                                                       | Description of housing intervention                                                                                                                                                                                                | Study design * | Summary of effect directions on health outcomes by domain** |             |        |                 | Summary of economic data and accompanying authors' interpretation reported                                                                                                                                                                                                                                                                                                        |
|------------------------------------------------------------------------------|------------------------------------------------------------------------------------------------------------------------------------------------------------------------------------------------------------------------------------|----------------|-------------------------------------------------------------|-------------|--------|-----------------|-----------------------------------------------------------------------------------------------------------------------------------------------------------------------------------------------------------------------------------------------------------------------------------------------------------------------------------------------------------------------------------|
|                                                                              |                                                                                                                                                                                                                                    |                | General health                                              | Respiratory | Mental | Illness/symptom |                                                                                                                                                                                                                                                                                                                                                                                   |
| <b>Intervention: Warmth &amp; energy efficiency improvements (post 1980)</b> |                                                                                                                                                                                                                                    |                |                                                             |             |        |                 |                                                                                                                                                                                                                                                                                                                                                                                   |
| Heyman et al, 2011 UK [1] [2] [3]                                            | Loft insulation (54%), cavity wall insulation (53%), draught exclusion (29%), heating controls (20%), central heating (13%), and other measures (not specified).                                                                   | RCT            | <>                                                          |             |        |                 | Mean cost of intervention per house £727. Mean fuel expenditure (Int/Cont n=99/83) £596/£567, p=0.408. Change mean warmth satisfaction score (4 point scale) Int/Cont (n=96/82) +1.18/+0.64**.                                                                                                                                                                                    |
| Howden-Chapman et al, 2008 New Zealand [4]                                   | Replacing 2kW electric heaters or portable unflued gas heaters with ≥4kW non-polluting alternative.                                                                                                                                | RCT            | ▲                                                           | ▲           |        | ◄►              | Mean cost of intervention per house \$NZ3000.                                                                                                                                                                                                                                                                                                                                     |
| Platt et al, 2007 UK [5]                                                     | Installation/repair/upgrading of central heating plus insulation, safety alarms where appropriate, advice on energy use, and benefit entitlement check offered.                                                                    | CBA            | ▲                                                           | ◄►          | ◄►     | ◄►              | Intervention group in receipt of improve heating were less likely to report difficulties to 'manage financially', than those who did not acquire heating (OR: 0.77, 95% CI: 0.60 to 0.99).                                                                                                                                                                                        |
| Lloyd et al 2008 UK [6]                                                      | Insulation (double skinning of walls) and draught proofing, gas central heating, double glazing, solar panels, dual-purpose heat recovery system, and front and back verandahs within internal living area of the flat.            | CBA            |                                                             |             |        | ▲               | Heating costs per week Before v After (>4 years after intervention) (Int/Cont n=75/40) £35 v £7 per week, no change in rent. Control group do not report any changes in housing costs (unclear how data were obtained).                                                                                                                                                           |
| Shortt et al, 2007 N. Ireland [7] [8] [9]                                    | Energy efficiency measures: included central heating, insulation and/or provision of new electrical appliances. Also promotion of benefit uptake for whole area (Int & Cont)                                                       | CBA            |                                                             | ◄►          | ▲      | ▲               | Fuel costs per annum Before v After (Int n=54) £1113 v £751.56. (Data refers to subgroup who received full intervention, no data for changes in control group).                                                                                                                                                                                                                   |
| Warm Front Study Group, 2006 UK [10] [11] [12] [13] [14] [15]                | Grants for insulation (cavity wall and/or loft) draught proofing, hot water tank jacket, and/or central heating, and minor measures, heating repair, energy efficient light bulbs, security measures (up to total value of £2,700) | CBA            | ◄►                                                          | ◄►          | ▲      | ◄►              | Maximum value of grant per house £2500. Following introduction of cavity wall and loft insulation space heating fuel consumption reduced by 10% in centrally heated properties and 17% in non-centrally heated properties. Introduction of gas central heating system had no significant impact on reducing fuel consumption after adjustment for increased internal temperature. |
| Allen, 2005 UK [16] [17]                                                     | Central heating installation/repair, plus general repairs (including roofing/guttering), improved bath/shower access, plus health, housing and benefits advice.                                                                    | UBA            | ▼                                                           |             | ▲      |                 | Mean cost (GBP) of intervention per house £4,477 (range £799-£10,144), total cost of project £176,297. Unclear if intervention was supplemented by additional contributions.<br><br>Funding from Disabled Facilities Grant £66,173<br>Mean funding per property £5,494<br><br>Funding from Occupational Therapy £1,691                                                            |

|                                                |                                                                                                                                                                                                                                                                                                           |        |             |            |   |    | <p>Mean funding per property £85</p> <p>Additional funding from other sources</p> <p>Renovation grant £14,081</p> <p>Home repair grant £8,811</p> <p>Range of funding varied considerably between individuals who received grants from one or more of these sources.</p>                                                                                                                                                                                                                                                                                                                                                                                                                                                                                                                                                                                                                                                                                                                                                                                                                                                                                                                                                                                                                                                                                                                                          |       |        |       |             |                                |           |        |         |                                        |        |          |        |              |        |        |            |                   |        |        |        |                                                |        |        |         |                 |      |        |       |                    |           |        |        |                                             |          |        |        |                                        |            |        |          |   |         |        |        |   |
|------------------------------------------------|-----------------------------------------------------------------------------------------------------------------------------------------------------------------------------------------------------------------------------------------------------------------------------------------------------------|--------|-------------|------------|---|----|-------------------------------------------------------------------------------------------------------------------------------------------------------------------------------------------------------------------------------------------------------------------------------------------------------------------------------------------------------------------------------------------------------------------------------------------------------------------------------------------------------------------------------------------------------------------------------------------------------------------------------------------------------------------------------------------------------------------------------------------------------------------------------------------------------------------------------------------------------------------------------------------------------------------------------------------------------------------------------------------------------------------------------------------------------------------------------------------------------------------------------------------------------------------------------------------------------------------------------------------------------------------------------------------------------------------------------------------------------------------------------------------------------------------|-------|--------|-------|-------------|--------------------------------|-----------|--------|---------|----------------------------------------|--------|----------|--------|--------------|--------|--------|------------|-------------------|--------|--------|--------|------------------------------------------------|--------|--------|---------|-----------------|------|--------|-------|--------------------|-----------|--------|--------|---------------------------------------------|----------|--------|--------|----------------------------------------|------------|--------|----------|---|---------|--------|--------|---|
| Allen, 2005 UK [18]                            | Heating installation/repair (n=20), reproofing (n=2), replacement windows (n=31), ventilation for those with asthma (n=28), intruder alarm (n=3), general home repair plus health and benefits advice.                                                                                                    | UBA    |             |            | ▲ |    | <p>Mean cost (GBP) of intervention per house £5,800 (range £350 to £14,000).</p>                                                                                                                                                                                                                                                                                                                                                                                                                                                                                                                                                                                                                                                                                                                                                                                                                                                                                                                                                                                                                                                                                                                                                                                                                                                                                                                                  |       |        |       |             |                                |           |        |         |                                        |        |          |        |              |        |        |            |                   |        |        |        |                                                |        |        |         |                 |      |        |       |                    |           |        |        |                                             |          |        |        |                                        |            |        |          |   |         |        |        |   |
| Eick et al 2004 UK [19]                        | Participants received one of three different interventions: 1: Surfaces- laminated floors, occlusive anti-allergen covers, central vacuum cleaning systems (n=9). 2: Mechanical Ventilation Heat Recovery (MVHR) (n=32). 3: Water borne central heating (n=8).                                            | RCT    |             |            | ▲ |    | <p>Costs (GBP) of reduced medical events (costs for 3 months) n=16</p> <table border="1"> <thead> <tr> <th>Event</th> <th>Before</th> <th>After</th> <th>Change</th> </tr> </thead> <tbody> <tr> <td>Absence for sch. due to asthma</td> <td>528.78</td> <td>50.36</td> <td>↓478.42</td> </tr> <tr> <td>Absence from sch. due to Other reasons</td> <td>151.08</td> <td>214.03</td> <td>↑62.95</td> </tr> <tr> <td>Visits to GP</td> <td>144.50</td> <td>8.50</td> <td>↓136.00</td> </tr> <tr> <td>Home visits by GP</td> <td>22.58</td> <td>0</td> <td>↓22.58</td> </tr> <tr> <td>Visits to out patients (first attendance £110)</td> <td>220.00</td> <td>0</td> <td>↓220.00</td> </tr> <tr> <td>Steroid courses</td> <td>5.70</td> <td>0</td> <td>↓5.70</td> </tr> <tr> <td>Antibiotic courses</td> <td>16.80</td> <td>0</td> <td>↓16.80</td> </tr> <tr> <td>Nebulisations for an acute attack of asthma</td> <td>1.23</td> <td>0</td> <td>↓1.23</td> </tr> <tr> <td>Hospital admissions (inc. 1 days stay)</td> <td>5740.00</td> <td>0</td> <td>↓5740.00</td> </tr> </tbody> </table> <p>Expenditure associated with the installation of MVHR system</p> <p>Capital cost for a whole house MVHR unit and installation costs £2500</p> <p>Yearly maintenance costs to be shouldered by the property owner £150</p> <p>Yearly running costs for the air circulation fan to be shouldered by the occupant £35</p> | Event | Before | After | Change      | Absence for sch. due to asthma | 528.78    | 50.36  | ↓478.42 | Absence from sch. due to Other reasons | 151.08 | 214.03   | ↑62.95 | Visits to GP | 144.50 | 8.50   | ↓136.00    | Home visits by GP | 22.58  | 0      | ↓22.58 | Visits to out patients (first attendance £110) | 220.00 | 0      | ↓220.00 | Steroid courses | 5.70 | 0      | ↓5.70 | Antibiotic courses | 16.80     | 0      | ↓16.80 | Nebulisations for an acute attack of asthma | 1.23     | 0      | ↓1.23  | Hospital admissions (inc. 1 days stay) | 5740.00    | 0      | ↓5740.00 |   |         |        |        |   |
| Event                                          | Before                                                                                                                                                                                                                                                                                                    | After  | Change      |            |   |    |                                                                                                                                                                                                                                                                                                                                                                                                                                                                                                                                                                                                                                                                                                                                                                                                                                                                                                                                                                                                                                                                                                                                                                                                                                                                                                                                                                                                                   |       |        |       |             |                                |           |        |         |                                        |        |          |        |              |        |        |            |                   |        |        |        |                                                |        |        |         |                 |      |        |       |                    |           |        |        |                                             |          |        |        |                                        |            |        |          |   |         |        |        |   |
| Absence for sch. due to asthma                 | 528.78                                                                                                                                                                                                                                                                                                    | 50.36  | ↓478.42     |            |   |    |                                                                                                                                                                                                                                                                                                                                                                                                                                                                                                                                                                                                                                                                                                                                                                                                                                                                                                                                                                                                                                                                                                                                                                                                                                                                                                                                                                                                                   |       |        |       |             |                                |           |        |         |                                        |        |          |        |              |        |        |            |                   |        |        |        |                                                |        |        |         |                 |      |        |       |                    |           |        |        |                                             |          |        |        |                                        |            |        |          |   |         |        |        |   |
| Absence from sch. due to Other reasons         | 151.08                                                                                                                                                                                                                                                                                                    | 214.03 | ↑62.95      |            |   |    |                                                                                                                                                                                                                                                                                                                                                                                                                                                                                                                                                                                                                                                                                                                                                                                                                                                                                                                                                                                                                                                                                                                                                                                                                                                                                                                                                                                                                   |       |        |       |             |                                |           |        |         |                                        |        |          |        |              |        |        |            |                   |        |        |        |                                                |        |        |         |                 |      |        |       |                    |           |        |        |                                             |          |        |        |                                        |            |        |          |   |         |        |        |   |
| Visits to GP                                   | 144.50                                                                                                                                                                                                                                                                                                    | 8.50   | ↓136.00     |            |   |    |                                                                                                                                                                                                                                                                                                                                                                                                                                                                                                                                                                                                                                                                                                                                                                                                                                                                                                                                                                                                                                                                                                                                                                                                                                                                                                                                                                                                                   |       |        |       |             |                                |           |        |         |                                        |        |          |        |              |        |        |            |                   |        |        |        |                                                |        |        |         |                 |      |        |       |                    |           |        |        |                                             |          |        |        |                                        |            |        |          |   |         |        |        |   |
| Home visits by GP                              | 22.58                                                                                                                                                                                                                                                                                                     | 0      | ↓22.58      |            |   |    |                                                                                                                                                                                                                                                                                                                                                                                                                                                                                                                                                                                                                                                                                                                                                                                                                                                                                                                                                                                                                                                                                                                                                                                                                                                                                                                                                                                                                   |       |        |       |             |                                |           |        |         |                                        |        |          |        |              |        |        |            |                   |        |        |        |                                                |        |        |         |                 |      |        |       |                    |           |        |        |                                             |          |        |        |                                        |            |        |          |   |         |        |        |   |
| Visits to out patients (first attendance £110) | 220.00                                                                                                                                                                                                                                                                                                    | 0      | ↓220.00     |            |   |    |                                                                                                                                                                                                                                                                                                                                                                                                                                                                                                                                                                                                                                                                                                                                                                                                                                                                                                                                                                                                                                                                                                                                                                                                                                                                                                                                                                                                                   |       |        |       |             |                                |           |        |         |                                        |        |          |        |              |        |        |            |                   |        |        |        |                                                |        |        |         |                 |      |        |       |                    |           |        |        |                                             |          |        |        |                                        |            |        |          |   |         |        |        |   |
| Steroid courses                                | 5.70                                                                                                                                                                                                                                                                                                      | 0      | ↓5.70       |            |   |    |                                                                                                                                                                                                                                                                                                                                                                                                                                                                                                                                                                                                                                                                                                                                                                                                                                                                                                                                                                                                                                                                                                                                                                                                                                                                                                                                                                                                                   |       |        |       |             |                                |           |        |         |                                        |        |          |        |              |        |        |            |                   |        |        |        |                                                |        |        |         |                 |      |        |       |                    |           |        |        |                                             |          |        |        |                                        |            |        |          |   |         |        |        |   |
| Antibiotic courses                             | 16.80                                                                                                                                                                                                                                                                                                     | 0      | ↓16.80      |            |   |    |                                                                                                                                                                                                                                                                                                                                                                                                                                                                                                                                                                                                                                                                                                                                                                                                                                                                                                                                                                                                                                                                                                                                                                                                                                                                                                                                                                                                                   |       |        |       |             |                                |           |        |         |                                        |        |          |        |              |        |        |            |                   |        |        |        |                                                |        |        |         |                 |      |        |       |                    |           |        |        |                                             |          |        |        |                                        |            |        |          |   |         |        |        |   |
| Nebulisations for an acute attack of asthma    | 1.23                                                                                                                                                                                                                                                                                                      | 0      | ↓1.23       |            |   |    |                                                                                                                                                                                                                                                                                                                                                                                                                                                                                                                                                                                                                                                                                                                                                                                                                                                                                                                                                                                                                                                                                                                                                                                                                                                                                                                                                                                                                   |       |        |       |             |                                |           |        |         |                                        |        |          |        |              |        |        |            |                   |        |        |        |                                                |        |        |         |                 |      |        |       |                    |           |        |        |                                             |          |        |        |                                        |            |        |          |   |         |        |        |   |
| Hospital admissions (inc. 1 days stay)         | 5740.00                                                                                                                                                                                                                                                                                                   | 0      | ↓5740.00    |            |   |    |                                                                                                                                                                                                                                                                                                                                                                                                                                                                                                                                                                                                                                                                                                                                                                                                                                                                                                                                                                                                                                                                                                                                                                                                                                                                                                                                                                                                                   |       |        |       |             |                                |           |        |         |                                        |        |          |        |              |        |        |            |                   |        |        |        |                                                |        |        |         |                 |      |        |       |                    |           |        |        |                                             |          |        |        |                                        |            |        |          |   |         |        |        |   |
| Caldwell et al 2001 UK [20]                    | Thermal improvements according to need, including heating, windows, cavity wall, insulation, fabric repair, re-roofing, loft insulation, external cladding, re-rendering, controlled entry, humidistat fans, close painting, new balcony rail, new doors, rewiring, new flooring, and backcourt lighting. | CBA    |             |            | ▲ | ◀▶ | <p>Changes in annual energy costs (£GBP) by Intervention site (participant reported)</p> <table border="1"> <thead> <tr> <th></th> <th>Before</th> <th>After</th> <th>Mean change</th> <th>Wilcoxon t</th> </tr> </thead> <tbody> <tr> <td>Tollcross</td> <td>414.92</td> <td>179.46</td> <td>235.46</td> <td>p&lt;0.01</td> </tr> <tr> <td>Ruchazie</td> <td>504.70</td> <td>47.00</td> <td>457.70</td> <td>p&lt;0.01</td> </tr> <tr> <td>Drumchapel</td> <td>406.19</td> <td>199.72</td> <td>206.47</td> <td>p&lt;0.01</td> </tr> <tr> <td>Lilybank</td> <td>419.70</td> <td>165.20</td> <td>254.60</td> <td>p&lt;0.01</td> </tr> </tbody> </table> <p>Changes in annual energy costs (control) (participant reported)</p> <table border="1"> <thead> <tr> <th></th> <th>Before</th> <th>After</th> <th>Mean change</th> </tr> </thead> <tbody> <tr> <td>Tollcross</td> <td>482.62</td> <td>482.62</td> <td>0</td> </tr> <tr> <td>Ruchazie</td> <td>506.70</td> <td>506.70</td> <td>0</td> </tr> <tr> <td>Drumchapel</td> <td>414.85</td> <td>414.85</td> <td>0</td> </tr> <tr> <td>Haghill</td> <td>405.27</td> <td>405.27</td> <td>0</td> </tr> </tbody> </table>                                                                                                                                                                                                                                             |       | Before | After | Mean change | Wilcoxon t                     | Tollcross | 414.92 | 179.46  | 235.46                                 | p<0.01 | Ruchazie | 504.70 | 47.00        | 457.70 | p<0.01 | Drumchapel | 406.19            | 199.72 | 206.47 | p<0.01 | Lilybank                                       | 419.70 | 165.20 | 254.60  | p<0.01          |      | Before | After | Mean change        | Tollcross | 482.62 | 482.62 | 0                                           | Ruchazie | 506.70 | 506.70 | 0                                      | Drumchapel | 414.85 | 414.85   | 0 | Haghill | 405.27 | 405.27 | 0 |
|                                                | Before                                                                                                                                                                                                                                                                                                    | After  | Mean change | Wilcoxon t |   |    |                                                                                                                                                                                                                                                                                                                                                                                                                                                                                                                                                                                                                                                                                                                                                                                                                                                                                                                                                                                                                                                                                                                                                                                                                                                                                                                                                                                                                   |       |        |       |             |                                |           |        |         |                                        |        |          |        |              |        |        |            |                   |        |        |        |                                                |        |        |         |                 |      |        |       |                    |           |        |        |                                             |          |        |        |                                        |            |        |          |   |         |        |        |   |
| Tollcross                                      | 414.92                                                                                                                                                                                                                                                                                                    | 179.46 | 235.46      | p<0.01     |   |    |                                                                                                                                                                                                                                                                                                                                                                                                                                                                                                                                                                                                                                                                                                                                                                                                                                                                                                                                                                                                                                                                                                                                                                                                                                                                                                                                                                                                                   |       |        |       |             |                                |           |        |         |                                        |        |          |        |              |        |        |            |                   |        |        |        |                                                |        |        |         |                 |      |        |       |                    |           |        |        |                                             |          |        |        |                                        |            |        |          |   |         |        |        |   |
| Ruchazie                                       | 504.70                                                                                                                                                                                                                                                                                                    | 47.00  | 457.70      | p<0.01     |   |    |                                                                                                                                                                                                                                                                                                                                                                                                                                                                                                                                                                                                                                                                                                                                                                                                                                                                                                                                                                                                                                                                                                                                                                                                                                                                                                                                                                                                                   |       |        |       |             |                                |           |        |         |                                        |        |          |        |              |        |        |            |                   |        |        |        |                                                |        |        |         |                 |      |        |       |                    |           |        |        |                                             |          |        |        |                                        |            |        |          |   |         |        |        |   |
| Drumchapel                                     | 406.19                                                                                                                                                                                                                                                                                                    | 199.72 | 206.47      | p<0.01     |   |    |                                                                                                                                                                                                                                                                                                                                                                                                                                                                                                                                                                                                                                                                                                                                                                                                                                                                                                                                                                                                                                                                                                                                                                                                                                                                                                                                                                                                                   |       |        |       |             |                                |           |        |         |                                        |        |          |        |              |        |        |            |                   |        |        |        |                                                |        |        |         |                 |      |        |       |                    |           |        |        |                                             |          |        |        |                                        |            |        |          |   |         |        |        |   |
| Lilybank                                       | 419.70                                                                                                                                                                                                                                                                                                    | 165.20 | 254.60      | p<0.01     |   |    |                                                                                                                                                                                                                                                                                                                                                                                                                                                                                                                                                                                                                                                                                                                                                                                                                                                                                                                                                                                                                                                                                                                                                                                                                                                                                                                                                                                                                   |       |        |       |             |                                |           |        |         |                                        |        |          |        |              |        |        |            |                   |        |        |        |                                                |        |        |         |                 |      |        |       |                    |           |        |        |                                             |          |        |        |                                        |            |        |          |   |         |        |        |   |
|                                                | Before                                                                                                                                                                                                                                                                                                    | After  | Mean change |            |   |    |                                                                                                                                                                                                                                                                                                                                                                                                                                                                                                                                                                                                                                                                                                                                                                                                                                                                                                                                                                                                                                                                                                                                                                                                                                                                                                                                                                                                                   |       |        |       |             |                                |           |        |         |                                        |        |          |        |              |        |        |            |                   |        |        |        |                                                |        |        |         |                 |      |        |       |                    |           |        |        |                                             |          |        |        |                                        |            |        |          |   |         |        |        |   |
| Tollcross                                      | 482.62                                                                                                                                                                                                                                                                                                    | 482.62 | 0           |            |   |    |                                                                                                                                                                                                                                                                                                                                                                                                                                                                                                                                                                                                                                                                                                                                                                                                                                                                                                                                                                                                                                                                                                                                                                                                                                                                                                                                                                                                                   |       |        |       |             |                                |           |        |         |                                        |        |          |        |              |        |        |            |                   |        |        |        |                                                |        |        |         |                 |      |        |       |                    |           |        |        |                                             |          |        |        |                                        |            |        |          |   |         |        |        |   |
| Ruchazie                                       | 506.70                                                                                                                                                                                                                                                                                                    | 506.70 | 0           |            |   |    |                                                                                                                                                                                                                                                                                                                                                                                                                                                                                                                                                                                                                                                                                                                                                                                                                                                                                                                                                                                                                                                                                                                                                                                                                                                                                                                                                                                                                   |       |        |       |             |                                |           |        |         |                                        |        |          |        |              |        |        |            |                   |        |        |        |                                                |        |        |         |                 |      |        |       |                    |           |        |        |                                             |          |        |        |                                        |            |        |          |   |         |        |        |   |
| Drumchapel                                     | 414.85                                                                                                                                                                                                                                                                                                    | 414.85 | 0           |            |   |    |                                                                                                                                                                                                                                                                                                                                                                                                                                                                                                                                                                                                                                                                                                                                                                                                                                                                                                                                                                                                                                                                                                                                                                                                                                                                                                                                                                                                                   |       |        |       |             |                                |           |        |         |                                        |        |          |        |              |        |        |            |                   |        |        |        |                                                |        |        |         |                 |      |        |       |                    |           |        |        |                                             |          |        |        |                                        |            |        |          |   |         |        |        |   |
| Haghill                                        | 405.27                                                                                                                                                                                                                                                                                                    | 405.27 | 0           |            |   |    |                                                                                                                                                                                                                                                                                                                                                                                                                                                                                                                                                                                                                                                                                                                                                                                                                                                                                                                                                                                                                                                                                                                                                                                                                                                                                                                                                                                                                   |       |        |       |             |                                |           |        |         |                                        |        |          |        |              |        |        |            |                   |        |        |        |                                                |        |        |         |                 |      |        |       |                    |           |        |        |                                             |          |        |        |                                        |            |        |          |   |         |        |        |   |

|                                                                                   |                                                                                                                                                                                                                                                                                                                           |             |    |  |    |                                                                                                                                                                                                                                                                                                                                                                                                                                                                                                                                                                                                                                                                                                                                                                                                                                                                                                                                                                                                                                                                                                                                                                                                                                                                                                                                                                                                                                                                                                                                                                                                                                                                                                                                                                                           |                   |           |             |                    |       |  |                      |      |  |                   |      |       |                     |      |       |              |           |             |                    |       |  |                      |      |  |                   |      |       |                     |      |       |                   |           |             |                    |      |  |                      |      |  |                   |       |        |                     |      |       |              |           |             |                    |      |  |                      |      |  |                   |       |       |                     |      |       |
|-----------------------------------------------------------------------------------|---------------------------------------------------------------------------------------------------------------------------------------------------------------------------------------------------------------------------------------------------------------------------------------------------------------------------|-------------|----|--|----|-------------------------------------------------------------------------------------------------------------------------------------------------------------------------------------------------------------------------------------------------------------------------------------------------------------------------------------------------------------------------------------------------------------------------------------------------------------------------------------------------------------------------------------------------------------------------------------------------------------------------------------------------------------------------------------------------------------------------------------------------------------------------------------------------------------------------------------------------------------------------------------------------------------------------------------------------------------------------------------------------------------------------------------------------------------------------------------------------------------------------------------------------------------------------------------------------------------------------------------------------------------------------------------------------------------------------------------------------------------------------------------------------------------------------------------------------------------------------------------------------------------------------------------------------------------------------------------------------------------------------------------------------------------------------------------------------------------------------------------------------------------------------------------------|-------------------|-----------|-------------|--------------------|-------|--|----------------------|------|--|-------------------|------|-------|---------------------|------|-------|--------------|-----------|-------------|--------------------|-------|--|----------------------|------|--|-------------------|------|-------|---------------------|------|-------|-------------------|-----------|-------------|--------------------|------|--|----------------------|------|--|-------------------|-------|--------|---------------------|------|-------|--------------|-----------|-------------|--------------------|------|--|----------------------|------|--|-------------------|-------|-------|---------------------|------|-------|
|                                                                                   |                                                                                                                                                                                                                                                                                                                           |             |    |  |    | <p>Electricity costs (£GBP) Before &amp; After intervention for sub-sample, comparing survey recall data with external data from fuel company.</p> <table> <tr> <td>Intervention n=24</td> <td>Mean cost</td> <td>Mean change</td> </tr> <tr> <td>Survey data Before</td> <td>12.92</td> <td></td> </tr> <tr> <td>External data Before</td> <td>8.56</td> <td></td> </tr> <tr> <td>Survey data After</td> <td>8.51</td> <td>-4.41</td> </tr> <tr> <td>External data After</td> <td>6.38</td> <td>-2.18</td> </tr> <tr> <td>Control n=12</td> <td>Mean cost</td> <td>Mean change</td> </tr> <tr> <td>Survey data Before</td> <td>11.58</td> <td></td> </tr> <tr> <td>External data Before</td> <td>6.31</td> <td></td> </tr> <tr> <td>Survey data After</td> <td>9.13</td> <td>-2.45</td> </tr> <tr> <td>External data After</td> <td>7.90</td> <td>+1.59</td> </tr> </table> <p>Gas costs (£GBP) Before &amp; After intervention for sub-sample, comparing survey recall data with external data from fuel company.</p> <table> <tr> <td>Intervention n=51</td> <td>Mean cost</td> <td>Mean change</td> </tr> <tr> <td>Survey data Before</td> <td>7.05</td> <td></td> </tr> <tr> <td>External data Before</td> <td>4.95</td> <td></td> </tr> <tr> <td>Survey data After</td> <td>19.87</td> <td>+12.82</td> </tr> <tr> <td>External data After</td> <td>5.03</td> <td>+0.08</td> </tr> <tr> <td>Control n=15</td> <td>Mean cost</td> <td>Mean change</td> </tr> <tr> <td>Survey data Before</td> <td>4.76</td> <td></td> </tr> <tr> <td>External data Before</td> <td>6.67</td> <td></td> </tr> <tr> <td>Survey data After</td> <td>10.94</td> <td>+6.18</td> </tr> <tr> <td>External data After</td> <td>4.51</td> <td>-2.16</td> </tr> </table> <p>(Time period covered not clear)</p> | Intervention n=24 | Mean cost | Mean change | Survey data Before | 12.92 |  | External data Before | 8.56 |  | Survey data After | 8.51 | -4.41 | External data After | 6.38 | -2.18 | Control n=12 | Mean cost | Mean change | Survey data Before | 11.58 |  | External data Before | 6.31 |  | Survey data After | 9.13 | -2.45 | External data After | 7.90 | +1.59 | Intervention n=51 | Mean cost | Mean change | Survey data Before | 7.05 |  | External data Before | 4.95 |  | Survey data After | 19.87 | +12.82 | External data After | 5.03 | +0.08 | Control n=15 | Mean cost | Mean change | Survey data Before | 4.76 |  | External data Before | 6.67 |  | Survey data After | 10.94 | +6.18 | External data After | 4.51 | -2.16 |
| Intervention n=24                                                                 | Mean cost                                                                                                                                                                                                                                                                                                                 | Mean change |    |  |    |                                                                                                                                                                                                                                                                                                                                                                                                                                                                                                                                                                                                                                                                                                                                                                                                                                                                                                                                                                                                                                                                                                                                                                                                                                                                                                                                                                                                                                                                                                                                                                                                                                                                                                                                                                                           |                   |           |             |                    |       |  |                      |      |  |                   |      |       |                     |      |       |              |           |             |                    |       |  |                      |      |  |                   |      |       |                     |      |       |                   |           |             |                    |      |  |                      |      |  |                   |       |        |                     |      |       |              |           |             |                    |      |  |                      |      |  |                   |       |       |                     |      |       |
| Survey data Before                                                                | 12.92                                                                                                                                                                                                                                                                                                                     |             |    |  |    |                                                                                                                                                                                                                                                                                                                                                                                                                                                                                                                                                                                                                                                                                                                                                                                                                                                                                                                                                                                                                                                                                                                                                                                                                                                                                                                                                                                                                                                                                                                                                                                                                                                                                                                                                                                           |                   |           |             |                    |       |  |                      |      |  |                   |      |       |                     |      |       |              |           |             |                    |       |  |                      |      |  |                   |      |       |                     |      |       |                   |           |             |                    |      |  |                      |      |  |                   |       |        |                     |      |       |              |           |             |                    |      |  |                      |      |  |                   |       |       |                     |      |       |
| External data Before                                                              | 8.56                                                                                                                                                                                                                                                                                                                      |             |    |  |    |                                                                                                                                                                                                                                                                                                                                                                                                                                                                                                                                                                                                                                                                                                                                                                                                                                                                                                                                                                                                                                                                                                                                                                                                                                                                                                                                                                                                                                                                                                                                                                                                                                                                                                                                                                                           |                   |           |             |                    |       |  |                      |      |  |                   |      |       |                     |      |       |              |           |             |                    |       |  |                      |      |  |                   |      |       |                     |      |       |                   |           |             |                    |      |  |                      |      |  |                   |       |        |                     |      |       |              |           |             |                    |      |  |                      |      |  |                   |       |       |                     |      |       |
| Survey data After                                                                 | 8.51                                                                                                                                                                                                                                                                                                                      | -4.41       |    |  |    |                                                                                                                                                                                                                                                                                                                                                                                                                                                                                                                                                                                                                                                                                                                                                                                                                                                                                                                                                                                                                                                                                                                                                                                                                                                                                                                                                                                                                                                                                                                                                                                                                                                                                                                                                                                           |                   |           |             |                    |       |  |                      |      |  |                   |      |       |                     |      |       |              |           |             |                    |       |  |                      |      |  |                   |      |       |                     |      |       |                   |           |             |                    |      |  |                      |      |  |                   |       |        |                     |      |       |              |           |             |                    |      |  |                      |      |  |                   |       |       |                     |      |       |
| External data After                                                               | 6.38                                                                                                                                                                                                                                                                                                                      | -2.18       |    |  |    |                                                                                                                                                                                                                                                                                                                                                                                                                                                                                                                                                                                                                                                                                                                                                                                                                                                                                                                                                                                                                                                                                                                                                                                                                                                                                                                                                                                                                                                                                                                                                                                                                                                                                                                                                                                           |                   |           |             |                    |       |  |                      |      |  |                   |      |       |                     |      |       |              |           |             |                    |       |  |                      |      |  |                   |      |       |                     |      |       |                   |           |             |                    |      |  |                      |      |  |                   |       |        |                     |      |       |              |           |             |                    |      |  |                      |      |  |                   |       |       |                     |      |       |
| Control n=12                                                                      | Mean cost                                                                                                                                                                                                                                                                                                                 | Mean change |    |  |    |                                                                                                                                                                                                                                                                                                                                                                                                                                                                                                                                                                                                                                                                                                                                                                                                                                                                                                                                                                                                                                                                                                                                                                                                                                                                                                                                                                                                                                                                                                                                                                                                                                                                                                                                                                                           |                   |           |             |                    |       |  |                      |      |  |                   |      |       |                     |      |       |              |           |             |                    |       |  |                      |      |  |                   |      |       |                     |      |       |                   |           |             |                    |      |  |                      |      |  |                   |       |        |                     |      |       |              |           |             |                    |      |  |                      |      |  |                   |       |       |                     |      |       |
| Survey data Before                                                                | 11.58                                                                                                                                                                                                                                                                                                                     |             |    |  |    |                                                                                                                                                                                                                                                                                                                                                                                                                                                                                                                                                                                                                                                                                                                                                                                                                                                                                                                                                                                                                                                                                                                                                                                                                                                                                                                                                                                                                                                                                                                                                                                                                                                                                                                                                                                           |                   |           |             |                    |       |  |                      |      |  |                   |      |       |                     |      |       |              |           |             |                    |       |  |                      |      |  |                   |      |       |                     |      |       |                   |           |             |                    |      |  |                      |      |  |                   |       |        |                     |      |       |              |           |             |                    |      |  |                      |      |  |                   |       |       |                     |      |       |
| External data Before                                                              | 6.31                                                                                                                                                                                                                                                                                                                      |             |    |  |    |                                                                                                                                                                                                                                                                                                                                                                                                                                                                                                                                                                                                                                                                                                                                                                                                                                                                                                                                                                                                                                                                                                                                                                                                                                                                                                                                                                                                                                                                                                                                                                                                                                                                                                                                                                                           |                   |           |             |                    |       |  |                      |      |  |                   |      |       |                     |      |       |              |           |             |                    |       |  |                      |      |  |                   |      |       |                     |      |       |                   |           |             |                    |      |  |                      |      |  |                   |       |        |                     |      |       |              |           |             |                    |      |  |                      |      |  |                   |       |       |                     |      |       |
| Survey data After                                                                 | 9.13                                                                                                                                                                                                                                                                                                                      | -2.45       |    |  |    |                                                                                                                                                                                                                                                                                                                                                                                                                                                                                                                                                                                                                                                                                                                                                                                                                                                                                                                                                                                                                                                                                                                                                                                                                                                                                                                                                                                                                                                                                                                                                                                                                                                                                                                                                                                           |                   |           |             |                    |       |  |                      |      |  |                   |      |       |                     |      |       |              |           |             |                    |       |  |                      |      |  |                   |      |       |                     |      |       |                   |           |             |                    |      |  |                      |      |  |                   |       |        |                     |      |       |              |           |             |                    |      |  |                      |      |  |                   |       |       |                     |      |       |
| External data After                                                               | 7.90                                                                                                                                                                                                                                                                                                                      | +1.59       |    |  |    |                                                                                                                                                                                                                                                                                                                                                                                                                                                                                                                                                                                                                                                                                                                                                                                                                                                                                                                                                                                                                                                                                                                                                                                                                                                                                                                                                                                                                                                                                                                                                                                                                                                                                                                                                                                           |                   |           |             |                    |       |  |                      |      |  |                   |      |       |                     |      |       |              |           |             |                    |       |  |                      |      |  |                   |      |       |                     |      |       |                   |           |             |                    |      |  |                      |      |  |                   |       |        |                     |      |       |              |           |             |                    |      |  |                      |      |  |                   |       |       |                     |      |       |
| Intervention n=51                                                                 | Mean cost                                                                                                                                                                                                                                                                                                                 | Mean change |    |  |    |                                                                                                                                                                                                                                                                                                                                                                                                                                                                                                                                                                                                                                                                                                                                                                                                                                                                                                                                                                                                                                                                                                                                                                                                                                                                                                                                                                                                                                                                                                                                                                                                                                                                                                                                                                                           |                   |           |             |                    |       |  |                      |      |  |                   |      |       |                     |      |       |              |           |             |                    |       |  |                      |      |  |                   |      |       |                     |      |       |                   |           |             |                    |      |  |                      |      |  |                   |       |        |                     |      |       |              |           |             |                    |      |  |                      |      |  |                   |       |       |                     |      |       |
| Survey data Before                                                                | 7.05                                                                                                                                                                                                                                                                                                                      |             |    |  |    |                                                                                                                                                                                                                                                                                                                                                                                                                                                                                                                                                                                                                                                                                                                                                                                                                                                                                                                                                                                                                                                                                                                                                                                                                                                                                                                                                                                                                                                                                                                                                                                                                                                                                                                                                                                           |                   |           |             |                    |       |  |                      |      |  |                   |      |       |                     |      |       |              |           |             |                    |       |  |                      |      |  |                   |      |       |                     |      |       |                   |           |             |                    |      |  |                      |      |  |                   |       |        |                     |      |       |              |           |             |                    |      |  |                      |      |  |                   |       |       |                     |      |       |
| External data Before                                                              | 4.95                                                                                                                                                                                                                                                                                                                      |             |    |  |    |                                                                                                                                                                                                                                                                                                                                                                                                                                                                                                                                                                                                                                                                                                                                                                                                                                                                                                                                                                                                                                                                                                                                                                                                                                                                                                                                                                                                                                                                                                                                                                                                                                                                                                                                                                                           |                   |           |             |                    |       |  |                      |      |  |                   |      |       |                     |      |       |              |           |             |                    |       |  |                      |      |  |                   |      |       |                     |      |       |                   |           |             |                    |      |  |                      |      |  |                   |       |        |                     |      |       |              |           |             |                    |      |  |                      |      |  |                   |       |       |                     |      |       |
| Survey data After                                                                 | 19.87                                                                                                                                                                                                                                                                                                                     | +12.82      |    |  |    |                                                                                                                                                                                                                                                                                                                                                                                                                                                                                                                                                                                                                                                                                                                                                                                                                                                                                                                                                                                                                                                                                                                                                                                                                                                                                                                                                                                                                                                                                                                                                                                                                                                                                                                                                                                           |                   |           |             |                    |       |  |                      |      |  |                   |      |       |                     |      |       |              |           |             |                    |       |  |                      |      |  |                   |      |       |                     |      |       |                   |           |             |                    |      |  |                      |      |  |                   |       |        |                     |      |       |              |           |             |                    |      |  |                      |      |  |                   |       |       |                     |      |       |
| External data After                                                               | 5.03                                                                                                                                                                                                                                                                                                                      | +0.08       |    |  |    |                                                                                                                                                                                                                                                                                                                                                                                                                                                                                                                                                                                                                                                                                                                                                                                                                                                                                                                                                                                                                                                                                                                                                                                                                                                                                                                                                                                                                                                                                                                                                                                                                                                                                                                                                                                           |                   |           |             |                    |       |  |                      |      |  |                   |      |       |                     |      |       |              |           |             |                    |       |  |                      |      |  |                   |      |       |                     |      |       |                   |           |             |                    |      |  |                      |      |  |                   |       |        |                     |      |       |              |           |             |                    |      |  |                      |      |  |                   |       |       |                     |      |       |
| Control n=15                                                                      | Mean cost                                                                                                                                                                                                                                                                                                                 | Mean change |    |  |    |                                                                                                                                                                                                                                                                                                                                                                                                                                                                                                                                                                                                                                                                                                                                                                                                                                                                                                                                                                                                                                                                                                                                                                                                                                                                                                                                                                                                                                                                                                                                                                                                                                                                                                                                                                                           |                   |           |             |                    |       |  |                      |      |  |                   |      |       |                     |      |       |              |           |             |                    |       |  |                      |      |  |                   |      |       |                     |      |       |                   |           |             |                    |      |  |                      |      |  |                   |       |        |                     |      |       |              |           |             |                    |      |  |                      |      |  |                   |       |       |                     |      |       |
| Survey data Before                                                                | 4.76                                                                                                                                                                                                                                                                                                                      |             |    |  |    |                                                                                                                                                                                                                                                                                                                                                                                                                                                                                                                                                                                                                                                                                                                                                                                                                                                                                                                                                                                                                                                                                                                                                                                                                                                                                                                                                                                                                                                                                                                                                                                                                                                                                                                                                                                           |                   |           |             |                    |       |  |                      |      |  |                   |      |       |                     |      |       |              |           |             |                    |       |  |                      |      |  |                   |      |       |                     |      |       |                   |           |             |                    |      |  |                      |      |  |                   |       |        |                     |      |       |              |           |             |                    |      |  |                      |      |  |                   |       |       |                     |      |       |
| External data Before                                                              | 6.67                                                                                                                                                                                                                                                                                                                      |             |    |  |    |                                                                                                                                                                                                                                                                                                                                                                                                                                                                                                                                                                                                                                                                                                                                                                                                                                                                                                                                                                                                                                                                                                                                                                                                                                                                                                                                                                                                                                                                                                                                                                                                                                                                                                                                                                                           |                   |           |             |                    |       |  |                      |      |  |                   |      |       |                     |      |       |              |           |             |                    |       |  |                      |      |  |                   |      |       |                     |      |       |                   |           |             |                    |      |  |                      |      |  |                   |       |        |                     |      |       |              |           |             |                    |      |  |                      |      |  |                   |       |       |                     |      |       |
| Survey data After                                                                 | 10.94                                                                                                                                                                                                                                                                                                                     | +6.18       |    |  |    |                                                                                                                                                                                                                                                                                                                                                                                                                                                                                                                                                                                                                                                                                                                                                                                                                                                                                                                                                                                                                                                                                                                                                                                                                                                                                                                                                                                                                                                                                                                                                                                                                                                                                                                                                                                           |                   |           |             |                    |       |  |                      |      |  |                   |      |       |                     |      |       |              |           |             |                    |       |  |                      |      |  |                   |      |       |                     |      |       |                   |           |             |                    |      |  |                      |      |  |                   |       |        |                     |      |       |              |           |             |                    |      |  |                      |      |  |                   |       |       |                     |      |       |
| External data After                                                               | 4.51                                                                                                                                                                                                                                                                                                                      | -2.16       |    |  |    |                                                                                                                                                                                                                                                                                                                                                                                                                                                                                                                                                                                                                                                                                                                                                                                                                                                                                                                                                                                                                                                                                                                                                                                                                                                                                                                                                                                                                                                                                                                                                                                                                                                                                                                                                                                           |                   |           |             |                    |       |  |                      |      |  |                   |      |       |                     |      |       |              |           |             |                    |       |  |                      |      |  |                   |      |       |                     |      |       |                   |           |             |                    |      |  |                      |      |  |                   |       |        |                     |      |       |              |           |             |                    |      |  |                      |      |  |                   |       |       |                     |      |       |
| Green et al 1999 UK [21] [22]                                                     | Replacement of underfloor electric heating, improved insulation, each towerblock was encased in a mineral wool insulation material, with an outer skin of rainscreen cladding using an aluminium cassette-type system. Open balconies were enclosed, new ventilation system. Plus substantial improved security measures. | RC          | ◀▶ |  |    | <p>Mean cost (£GBP) of intervention per house £28000.<br/> Estimated heating bills Int/Cont £4.46 v £9.04 (difference in fuel costs attributed largely to differences in fuel supplier tariffs rather than consumption); weekly rent Int/Cont £29.64/£19.63</p>                                                                                                                                                                                                                                                                                                                                                                                                                                                                                                                                                                                                                                                                                                                                                                                                                                                                                                                                                                                                                                                                                                                                                                                                                                                                                                                                                                                                                                                                                                                           |                   |           |             |                    |       |  |                      |      |  |                   |      |       |                     |      |       |              |           |             |                    |       |  |                      |      |  |                   |      |       |                     |      |       |                   |           |             |                    |      |  |                      |      |  |                   |       |        |                     |      |       |              |           |             |                    |      |  |                      |      |  |                   |       |       |                     |      |       |
| <b>Intervention: Rehousing/retrofitting +/- neighbourhood renewal) post 1995)</b> |                                                                                                                                                                                                                                                                                                                           |             |    |  |    |                                                                                                                                                                                                                                                                                                                                                                                                                                                                                                                                                                                                                                                                                                                                                                                                                                                                                                                                                                                                                                                                                                                                                                                                                                                                                                                                                                                                                                                                                                                                                                                                                                                                                                                                                                                           |                   |           |             |                    |       |  |                      |      |  |                   |      |       |                     |      |       |              |           |             |                    |       |  |                      |      |  |                   |      |       |                     |      |       |                   |           |             |                    |      |  |                      |      |  |                   |       |        |                     |      |       |              |           |             |                    |      |  |                      |      |  |                   |       |       |                     |      |       |
| Thomson et al, 2007 UK [23]                                                       | Housing-led neighbourhood regeneration. Replacing ex-local authority social housing stock reported to have damp and mould with new build housing in same locality. Accompanied by physical and social neighbourhood improvements.                                                                                         | CBA         | ▲  |  | ◀▶ | <p>Rent data (£GBP) presented for 33 participants (Int/Cont 18/15).<br/> Mean rent per week at baseline Int/Cont £32.24/£31.00.<br/> Mean change in rent per week Int/Cont +£6.65/+£1.31.</p> <p>Some residents reported increased fuel cost (int/cont 14/5) actual cost data not presented.</p>                                                                                                                                                                                                                                                                                                                                                                                                                                                                                                                                                                                                                                                                                                                                                                                                                                                                                                                                                                                                                                                                                                                                                                                                                                                                                                                                                                                                                                                                                          |                   |           |             |                    |       |  |                      |      |  |                   |      |       |                     |      |       |              |           |             |                    |       |  |                      |      |  |                   |      |       |                     |      |       |                   |           |             |                    |      |  |                      |      |  |                   |       |        |                     |      |       |              |           |             |                    |      |  |                      |      |  |                   |       |       |                     |      |       |
| Critchley et al 2004 UK [24]                                                      | Low-income tenants moved from poor-quality (hard to heat with damp, mould & condensation problems reported to be highly prevalent) tower blocks to high-quality low-rise new build accommodation.                                                                                                                         | CBA         | <> |  | <> | <p>Over 12 year period Liverpool Housing Action Trust invested £260m in housing renewal (this appears to be the total housing budget and does not refer specifically to this intervention). Estimated annual running costs Before v After rehousing for- two person household £662 v £347; single person's costs £610 v £319.<br/> Percentage living in fuel poverty (excluding housing benefit), Before v After intervention for: 1 person households 86% v 14%; 2 person households 48% v 8%.</p>                                                                                                                                                                                                                                                                                                                                                                                                                                                                                                                                                                                                                                                                                                                                                                                                                                                                                                                                                                                                                                                                                                                                                                                                                                                                                       |                   |           |             |                    |       |  |                      |      |  |                   |      |       |                     |      |       |              |           |             |                    |       |  |                      |      |  |                   |      |       |                     |      |       |                   |           |             |                    |      |  |                      |      |  |                   |       |        |                     |      |       |              |           |             |                    |      |  |                      |      |  |                   |       |       |                     |      |       |
| Thomas et al,                                                                     | Housing-led neighbourhood regeneration                                                                                                                                                                                                                                                                                    | CBA         |    |  | ◀▶ | Total cost (£GBP) of renewal project (Single Regeneration Budget) £2million over study                                                                                                                                                                                                                                                                                                                                                                                                                                                                                                                                                                                                                                                                                                                                                                                                                                                                                                                                                                                                                                                                                                                                                                                                                                                                                                                                                                                                                                                                                                                                                                                                                                                                                                    |                   |           |             |                    |       |  |                      |      |  |                   |      |       |                     |      |       |              |           |             |                    |       |  |                      |      |  |                   |      |       |                     |      |       |                   |           |             |                    |      |  |                      |      |  |                   |       |        |                     |      |       |              |           |             |                    |      |  |                      |      |  |                   |       |       |                     |      |       |

|                                            |                                                                                                                                                                                                                          |      |                                           |    |   |    |                                                                                                                                                                                                                                                                                                                                                                                                                                                                                                                                                                                                                                                                                                                                                                                                                                                                                           |
|--------------------------------------------|--------------------------------------------------------------------------------------------------------------------------------------------------------------------------------------------------------------------------|------|-------------------------------------------|----|---|----|-------------------------------------------------------------------------------------------------------------------------------------------------------------------------------------------------------------------------------------------------------------------------------------------------------------------------------------------------------------------------------------------------------------------------------------------------------------------------------------------------------------------------------------------------------------------------------------------------------------------------------------------------------------------------------------------------------------------------------------------------------------------------------------------------------------------------------------------------------------------------------------------|
| 2005<br>UK [25]<br>[26]                    | (Single Regeneration Budget) plus other employment and education initiatives related to SRB. Housing improvement mostly improvements to heating, bathrooms, kitchens and windows.                                        |      |                                           |    |   |    | period. Costs do not relate necessarily to study sample and not specifically to housing, project included range of non-housing investment improvements.                                                                                                                                                                                                                                                                                                                                                                                                                                                                                                                                                                                                                                                                                                                                   |
| Blackman et al,<br>2001<br>UK [27]<br>[28] | Refurbishment or demolition of void dwellings, discretionary renovation grants for individual dwellings, heating and security improvements. Landscaping, environmental improvements.                                     | UBA  | ▼                                         | ▼  | ▲ |    | Mean cost (£GBP) of renewal project per house £8000. Total cost of housing renewal programme £5.5million. Costs do not relate necessarily to study sample and not specifically to housing, project included some environmental improvements and road safety improvements.                                                                                                                                                                                                                                                                                                                                                                                                                                                                                                                                                                                                                 |
| Ambrose<br>2000<br>UK [17]<br>[29] [30]    | Rehoused to better accommodation, or had existing accommodation improved plus neighbourhood improvements (Single Regeneration Budget) plus other employment and education initiatives related to regeneration programme. | UBA  |                                           | ◄► | ▲ | ◄► | <p>Stage 1 survey 131 households (467 people) interviewed. Stage 2 survey 18 of these households were interviewed plus an extra two added to make sample more ethnically representative (92 people). Retrospective study, sample asked to recall and present bill evidence of household costs before intervention.</p> <p>Before v After (Two years after intervention) : Mean weekly housing costs (£GBP)- rent (n=105 households) £52 v £72; water (n=60) £0.92 v £4.38; gas (n=92) £5.54 v £6.46; electricity (n=98) £4.62 v £5.77.</p> <p>Stage 2 (Before v After- 3 years after intervention) (n=19 households): Mean weekly housing costs- rent £60.33 v £79.30; water £3.50 v £5.06; gas (n=9) £8.28 v £6.15; electricity (n=6) £4.76 v £3.33.</p> <p>NB: Not all participants reporting cost data also reported health data so unclear how two datasets relate to each other.</p> |
| Walker & Bradshaw,<br>1999<br>UK [31]      | Housing led neighbourhood regeneration. Homes renovated with additional improvement to physical and social neighbourhood environment.                                                                                    | XCBA | No health impacts only health service use |    |   |    | <p>Investment of £8.6million by local authority in repair of homes and renovation of property.</p> <p>Percentage change in general practice prescribing costs per 1000 patients after intervention ( 1994-1998).</p> <p>Intervention practice A/Intervention practice B/ Control practices:</p> <p>Gastrointestinal +12.33%/+25.8%/+12.92% ;</p> <p>Cardiovascular +31.27%/+37.56%/+27.01% ;</p> <p>Respiratory +46.92%/+82.87%/+43.57+;</p> <p>Central nervous system +79.22%/+73.7%/+79.7% ;</p> <p>Hypnotic +67.58%/+15.99%/+93.33% ;</p> <p>Anxiolytic -74.12%/-12.29%/-6.51% ;</p> <p>Antidepressant +109.51%/+86.27%/+120.77% ;</p> <p>Analgesic +26.92%/+26.59%/+42.66% ;</p> <p>Anti-infective +12.96%/-22.19%/-26.26% .</p> <p>(Int A and Int B. are GP practices within intervention area. Control data taken from 7 GP practices in surrounding area)</p>                      |
| Halpern,<br>1995<br>UK [32]                | Housing refurbishment and neighbourhood regeneration. Some housing improvement and with major re-design of estate- to reduce traffic speed, improve visibility of parked cars.                                           | UBA  |                                           |    | ▲ |    | Mean cost (£GBP) of intervention per house (full refurbishment) £10,000-£15,000.                                                                                                                                                                                                                                                                                                                                                                                                                                                                                                                                                                                                                                                                                                                                                                                                          |

| Woodin et al, 1996<br>UK [33]                                                       | Mix of neighbourhood and housing renewal. Original housing demolished and replaced with new stock                                                                 | R             | No health impacts only health service use | Total cost of renewal project £97million, figure includes more than study sample.                                                                                                                                                                                                                                                                                                                                                                                                                                                                                                                                                                                                                                                                                                                                                                                                                                                                                                                            |              |                    |               |             |        |         |       |        |         |         |       |       |            |         |         |             |       |         |             |       |       |         |         |         |            |        |         |       |          |          |
|-------------------------------------------------------------------------------------|-------------------------------------------------------------------------------------------------------------------------------------------------------------------|---------------|-------------------------------------------|--------------------------------------------------------------------------------------------------------------------------------------------------------------------------------------------------------------------------------------------------------------------------------------------------------------------------------------------------------------------------------------------------------------------------------------------------------------------------------------------------------------------------------------------------------------------------------------------------------------------------------------------------------------------------------------------------------------------------------------------------------------------------------------------------------------------------------------------------------------------------------------------------------------------------------------------------------------------------------------------------------------|--------------|--------------------|---------------|-------------|--------|---------|-------|--------|---------|---------|-------|-------|------------|---------|---------|-------------|-------|---------|-------------|-------|-------|---------|---------|---------|------------|--------|---------|-------|----------|----------|
| <b>Intervention: Provision of basic housing needs/ low or middle income country</b> |                                                                                                                                                                   |               |                                           |                                                                                                                                                                                                                                                                                                                                                                                                                                                                                                                                                                                                                                                                                                                                                                                                                                                                                                                                                                                                              |              |                    |               |             |        |         |       |        |         |         |       |       |            |         |         |             |       |         |             |       |       |         |         |         |            |        |         |       |          |          |
| Cattaneo et al, 2006<br>Mexico [34]                                                 | Replacing mud floors (up to 50sqm) with cement floors.                                                                                                            | RC            |                                           | ▲ ▲ Mean cost of intervention per house = \$(US)150.                                                                                                                                                                                                                                                                                                                                                                                                                                                                                                                                                                                                                                                                                                                                                                                                                                                                                                                                                         |              |                    |               |             |        |         |       |        |         |         |       |       |            |         |         |             |       |         |             |       |       |         |         |         |            |        |         |       |          |          |
| Aga Khan Health Service, 2001<br>Pakistan [35]                                      | Installation of roof hatch windows, wall and roof insulation, double glass windows, stove with water warming facility                                             | RC            |                                           | ▲ Annual spending on health care for intervention and control groups after intervention.<br><table border="1"> <thead> <tr> <th>Rupees Spent</th> <th>Intervention n (%)</th> <th>Control n (%)</th> </tr> </thead> <tbody> <tr> <td>No spending</td> <td>7 (14)</td> <td>16 (16)</td> </tr> <tr> <td>1-499</td> <td>8 (16)</td> <td>13 (13)</td> </tr> <tr> <td>500-999</td> <td>1 (2)</td> <td>5 (5)</td> </tr> <tr> <td>1000-2,999</td> <td>10 (20)</td> <td>24 (24)</td> </tr> <tr> <td>3,000-5,999</td> <td>3 (6)</td> <td>15 (15)</td> </tr> <tr> <td>6,000-9,999</td> <td>3 (6)</td> <td>3 (3)</td> </tr> <tr> <td>&gt;10,000</td> <td>10 (20)</td> <td>13 (13)</td> </tr> <tr> <td>Don't know</td> <td>8 (16)</td> <td>10 (10)</td> </tr> <tr> <td>Total</td> <td>50 (100)</td> <td>99 (100)</td> </tr> </tbody> </table> <p>Estimated that insulation has resulted in up to 50% reduction in wood consumption by a typical family, reducing cost and time spent collecting and buying firewood.</p> | Rupees Spent | Intervention n (%) | Control n (%) | No spending | 7 (14) | 16 (16) | 1-499 | 8 (16) | 13 (13) | 500-999 | 1 (2) | 5 (5) | 1000-2,999 | 10 (20) | 24 (24) | 3,000-5,999 | 3 (6) | 15 (15) | 6,000-9,999 | 3 (6) | 3 (3) | >10,000 | 10 (20) | 13 (13) | Don't know | 8 (16) | 10 (10) | Total | 50 (100) | 99 (100) |
| Rupees Spent                                                                        | Intervention n (%)                                                                                                                                                | Control n (%) |                                           |                                                                                                                                                                                                                                                                                                                                                                                                                                                                                                                                                                                                                                                                                                                                                                                                                                                                                                                                                                                                              |              |                    |               |             |        |         |       |        |         |         |       |       |            |         |         |             |       |         |             |       |       |         |         |         |            |        |         |       |          |          |
| No spending                                                                         | 7 (14)                                                                                                                                                            | 16 (16)       |                                           |                                                                                                                                                                                                                                                                                                                                                                                                                                                                                                                                                                                                                                                                                                                                                                                                                                                                                                                                                                                                              |              |                    |               |             |        |         |       |        |         |         |       |       |            |         |         |             |       |         |             |       |       |         |         |         |            |        |         |       |          |          |
| 1-499                                                                               | 8 (16)                                                                                                                                                            | 13 (13)       |                                           |                                                                                                                                                                                                                                                                                                                                                                                                                                                                                                                                                                                                                                                                                                                                                                                                                                                                                                                                                                                                              |              |                    |               |             |        |         |       |        |         |         |       |       |            |         |         |             |       |         |             |       |       |         |         |         |            |        |         |       |          |          |
| 500-999                                                                             | 1 (2)                                                                                                                                                             | 5 (5)         |                                           |                                                                                                                                                                                                                                                                                                                                                                                                                                                                                                                                                                                                                                                                                                                                                                                                                                                                                                                                                                                                              |              |                    |               |             |        |         |       |        |         |         |       |       |            |         |         |             |       |         |             |       |       |         |         |         |            |        |         |       |          |          |
| 1000-2,999                                                                          | 10 (20)                                                                                                                                                           | 24 (24)       |                                           |                                                                                                                                                                                                                                                                                                                                                                                                                                                                                                                                                                                                                                                                                                                                                                                                                                                                                                                                                                                                              |              |                    |               |             |        |         |       |        |         |         |       |       |            |         |         |             |       |         |             |       |       |         |         |         |            |        |         |       |          |          |
| 3,000-5,999                                                                         | 3 (6)                                                                                                                                                             | 15 (15)       |                                           |                                                                                                                                                                                                                                                                                                                                                                                                                                                                                                                                                                                                                                                                                                                                                                                                                                                                                                                                                                                                              |              |                    |               |             |        |         |       |        |         |         |       |       |            |         |         |             |       |         |             |       |       |         |         |         |            |        |         |       |          |          |
| 6,000-9,999                                                                         | 3 (6)                                                                                                                                                             | 3 (3)         |                                           |                                                                                                                                                                                                                                                                                                                                                                                                                                                                                                                                                                                                                                                                                                                                                                                                                                                                                                                                                                                                              |              |                    |               |             |        |         |       |        |         |         |       |       |            |         |         |             |       |         |             |       |       |         |         |         |            |        |         |       |          |          |
| >10,000                                                                             | 10 (20)                                                                                                                                                           | 13 (13)       |                                           |                                                                                                                                                                                                                                                                                                                                                                                                                                                                                                                                                                                                                                                                                                                                                                                                                                                                                                                                                                                                              |              |                    |               |             |        |         |       |        |         |         |       |       |            |         |         |             |       |         |             |       |       |         |         |         |            |        |         |       |          |          |
| Don't know                                                                          | 8 (16)                                                                                                                                                            | 10 (10)       |                                           |                                                                                                                                                                                                                                                                                                                                                                                                                                                                                                                                                                                                                                                                                                                                                                                                                                                                                                                                                                                                              |              |                    |               |             |        |         |       |        |         |         |       |       |            |         |         |             |       |         |             |       |       |         |         |         |            |        |         |       |          |          |
| Total                                                                               | 50 (100)                                                                                                                                                          | 99 (100)      |                                           |                                                                                                                                                                                                                                                                                                                                                                                                                                                                                                                                                                                                                                                                                                                                                                                                                                                                                                                                                                                                              |              |                    |               |             |        |         |       |        |         |         |       |       |            |         |         |             |       |         |             |       |       |         |         |         |            |        |         |       |          |          |
| Aiga et al, 2002<br>Phillipines [36] [37]                                           | Provision of private water faucet (with meter) and private toilet, electricity, paved roadways to every household.                                                | R             |                                           | ▲ Mean monthly household expenditure on water (Pesos) Int/Cont 109/234<br>Intervention cost not available.<br>Mean household income (Pesos) after intervention Int/Cont 8032/4530. Increased household income attributed to increase in time available to earn income (as a result of improved water supply). Estimated that increase in income in the control group would be if they received an improvement in water supply 5740 Pesos.                                                                                                                                                                                                                                                                                                                                                                                                                                                                                                                                                                    |              |                    |               |             |        |         |       |        |         |         |       |       |            |         |         |             |       |         |             |       |       |         |         |         |            |        |         |       |          |          |
| Wolff et al 2001<br>Malawi [38]                                                     | Rehousing from 2 room traditional mud house with thatched roof and hard packed mud floors to 3 room house with fired mud bricks, tiled roof, concrete foundation. | UBA           | ▲                                         | ▲ Mean cost of building a new 'habitat' house, \$ (US) 550.                                                                                                                                                                                                                                                                                                                                                                                                                                                                                                                                                                                                                                                                                                                                                                                                                                                                                                                                                  |              |                    |               |             |        |         |       |        |         |         |       |       |            |         |         |             |       |         |             |       |       |         |         |         |            |        |         |       |          |          |
| <b>Intervention: Rehousing from slums (pre-1965)</b>                                |                                                                                                                                                                   |               |                                           |                                                                                                                                                                                                                                                                                                                                                                                                                                                                                                                                                                                                                                                                                                                                                                                                                                                                                                                                                                                                              |              |                    |               |             |        |         |       |        |         |         |       |       |            |         |         |             |       |         |             |       |       |         |         |         |            |        |         |       |          |          |
| Chapin, 1938<br>USA [39]                                                            | Rehousing and relocation from slum housing/neighbourhood to housing/neighbourhoods with slightly better living conditions                                         | UBA           |                                           | ^ Mean cost of intervention per house \$(US)7,791 total cost of project \$(US)3,623,000 for 465 houses.<br>Before v After intervention, mean unit rental \$(US)15.68 v 17.98, mean room rental \$(US)3.21 versus 3.79.                                                                                                                                                                                                                                                                                                                                                                                                                                                                                                                                                                                                                                                                                                                                                                                       |              |                    |               |             |        |         |       |        |         |         |       |       |            |         |         |             |       |         |             |       |       |         |         |         |            |        |         |       |          |          |
| McGonigle et al, 1936<br>UK [40]                                                    | Moved from slum housing estate (demolished) to new build houses on self-contained municipal housing estate.                                                       | CBA           |                                           | v Mean weekly rent Before v After Int 4s.8d/9s.0d. Cont 4s.7½d/4s.10½d (s=shilling, d=pence, 1 shilling=5 pence). Rent as a % of income subdivided by employed or unemployed status (Int/Cont n=28/27 families). Int: Employed/unemployed 20.5%/31.3% Cont: Employed/unemployed 14.7%/20.8% (Int/Cont n=35/30 families) Before v After Int/Cont rent as % of income 20.5%/14.7% v 31.3%/20.8%.                                                                                                                                                                                                                                                                                                                                                                                                                                                                                                                                                                                                               |              |                    |               |             |        |         |       |        |         |         |       |       |            |         |         |             |       |         |             |       |       |         |         |         |            |        |         |       |          |          |

\*Study design: RCT: Randomised Controlled Trial; CBA: Controlled Before & After; UBA: Uncontrolled Before & After; XCBA: Controlled Before & After using area level cross sectional data at both time points; XUBA: Uncontrolled Before & After using area level cross sectional data at both time points; RC: Retrospective controlled study; R: Retrospective uncontrolled.

\*\* Effect direction: upward arrow= positive health impact, downward arrow= negative health impact, sideways arrow= no change/mixed effects/conflicting findings

Sample size: Final sample size (individuals) in intervention group Large arrow >300; medium arrow 50-300; small arrow <50

Statistical significance: Black arrow  $p < 0.05$ ; grey arrow  $p > 0.05$ ; empty arrow = no statistics/data reported  
£ = British pound sterling; \$(US) = United States of America dollar; \$NZ = New Zealand dollar

## References

- 1 Heyman B, Harrington BE, Heyman A, *et al.* A randomised controlled trial of an energy efficiency intervention for families living in fuel poverty. *Housing Studies* in press 2010.
- 2 Heyman B, Harrington BE, Merleau-Ponty N, *et al.* Keeping warm and staying well. Does home energy efficiency mediate the relationship between socio-economic status and the risk of poorer health? *Housing Studies* 2005;**20**:649-64.
- 3 Harrington BE, Heyman B, Heyman A, *et al.* Keeping warm and staying well: findings from the qualitative arm of the Warm Homes Project. *Health & Social Care in the Community* 2005:259-67.
- 4 Howden-Chapman P, Pierse N, Nicholls S, *et al.* Effects of improved home heating on asthma in community dwelling children: randomised controlled trial. *British Medical Journal* 2008;**337**:1411a-.
- 5 Platt S, Mitchell R, Petticrew M, *et al.* The Scottish Executive Central Heating Programme: assessing impacts on health. *Research Findings 239/2007*. Edinburgh: Scottish Executive: Social Research Development Department 2007.
- 6 Lloyd EL, McCormack C, McKeever M, *et al.* The effect of improving the thermal quality of cold housing on blood pressure and general health: a research note. *J Epidemiol Community Health* 2008;**62**:793-7.
- 7 Shortt N, Rugkasa J. "The walls were so damp and cold" fuel poverty and ill health in Northern Ireland: Results from a housing intervention. *Health & Place Part Special Issue: Environmental Justice, Population Health, Critical Theory and GIS* 2007;**13**:99-110.
- 8 Rugkasa J, Shortt N, Boydell L. Engaging communities: an evaluation of a community development model for tackling rural fuel poverty (<http://www.inispho.org/phis/catalogue/resdetails.php?resID=245>, accessed 2/08/07). Institute of Public Health in Ireland 2004.
- 9 Rugkasa J, Shortt N, K. , Boydell L. The right tool for the task: "boundary spanners" in a partnership approach to tackle fuel poverty in rural Northern Ireland. *Health and Social Care in the Community* 2007;**15**:221-30.
- 10 The Warm Front Study Group. Health impact evaluation of England's home energy efficiency scheme (Warm Front). Headline results. Report to Energy Saving Trust/Defra. March 2006. 2006.
- 11 Oreszczyn T, Hong SH, Ridley I, *et al.* Determinants of winter indoor temperatures in low income households in England. *Energy and Buildings* 2006;**38**:245-52.
- 12 Hong SH, Oreszczyn T, Ridley I, *et al.* The impact of energy efficient refurbishment on the space heating fuel consumption in English dwellings. *Energy and Buildings* 2006;**38**:1171-81.
- 13 Critchley R, Gilbertson J, Grimsley M, *et al.* Living in cold homes after heating improvements: Evidence from Warm-Front, England's home energy efficiency scheme. *Applied Energy* 2006;**84**:147-58.
- 14 Gilbertson J, Stevens M, Stiell B, *et al.* Home is where the hearth is: Grant recipients' views of England's home energy efficiency scheme (Warm Front). *Social Science & Medicine* 2006;**63**:946-56.
- 15 Hutchinson EJ, Wilkinson P, Hong SH, *et al.* Can we improve the identification of cold homes for targeted home energy-efficiency improvements? *Applied Energy* 2006;**83**:1198-209.
- 16 Allen T. Private sector housing improvement in the UK and the chronically ill: implications for collaborative working. *Housing Studies* 2005;**20**:63-80.

- 17 Ambrose P. A drop in the ocean; the health gain from the Central Stepney SRB in the context of national health inequalities. London: The Health and Social Policy Research Centre, University of Brighton 2000.
- 18 Allen T. Evaluation of the housing for healthier hearts project April 2003-March 2005. Bradford: University of Bradford 2005.
- 19 Eick SA, Houghton N, Richardson G. The breath of fresh air project: Draft report for comments September 2004. Plymouth: AC & T England Ltd. 2004.
- 20 Caldwell J, McGowan S, McPhail J, *et al.* Glasgow Warm Homes Study: Final Report ([http://www.glasgow.gov.uk/NR/rdonlyres/BDA67F07-0A84-4F2A-924E-FB6BA8EFB4D9/0/final\\_report.pdf](http://www.glasgow.gov.uk/NR/rdonlyres/BDA67F07-0A84-4F2A-924E-FB6BA8EFB4D9/0/final_report.pdf), accessed 1/8/07). Glasgow: Glasgow City Council Housing Services 2001.
- 21 Green G, Gilbertson J. Housing, poverty and health: the impact of housing investment on the health and quality of life of low income residents. *Open House International* 1999;**24**:41-53.
- 22 Green G, Ormandy D, Brazier J, *et al.* Tolerant building: the impact of energy efficiency measures on living conditions and health status. In: Nicol F, Rudge J, eds. *Cutting the cost of cold*. London: E & FN Spon 2000:87-103.
- 23 Thomson H, Morrison D, Petticrew M. The health impacts of housing-led regeneration: a prospective controlled study. *J Epidemiol Community Health* 2007;**61**:211-4.
- 24 Critchley R, Gilbertson J, Green G, *et al.* Housing investment and health in Liverpool. Sheffield: CRESR, Sheffield-Hallam University 2004.
- 25 Thomas R, Evans S, Huxley P, *et al.* Housing improvement and self-reported mental distress among council estate residents. *Social Science & Medicine* 2005;**60**:2773-83.
- 26 Huxley P, Evans S, Leese M, *et al.* Urban regeneration and mental health. *Social Psychiatry & Psychiatric Epidemiology* 2004;**39**:280-5.
- 27 Blackman T, Harvey J. Housing renewal and mental health: a case study. *Journal of Mental Health* 2001;**10**:571-83.
- 28 Blackman T, Harvey J, Lawrence M, *et al.* Neighbourhood renewal and health: Evidence from a local case study. *Health & Place* 2001;**7**:93-103.
- 29 Ambrose P, MacDonald D. For richer, for poorer? Counting the costs of regeneration in Stepney. Brighton: University of Brighton 2001.
- 30 Ambrose P. 'I mustn't laugh too much': housing and health on the Limehouse Fields and Ocean estates in Stepney. Centre for Urban and Regional Research, University of Sussex 1996.
- 31 Walker R, Bradshaw N. The Oakdale renewal scheme: use of prescribing data to assess the impact on the health of residents. Gwent Health Authority & Welsh School of Pharmacy 1999.
- 32 Halpern D. Mental health and the built environment: More than bricks and mortar? *Philadelphia, PA, US: Taylor & Francis* 1995;**240**.
- 33 Woodin S, Delves C, Wadhams C. 'Just what the doctor ordered': a study of housing, health and community safety in Holly Street, Hackney. Hackney, London: Comprehensive Estates Initiative, Hackney Housing Department 1996.
- 34 Cattaneo MD, Galiani S, Gertler PJ, *et al.* Housing, health and happiness (*final report to the Mexican Government*). Haas School of Business and School of Public Health, University of California, Berkeley 2007.
- 35 The impact of BACIP interventions on health and housing in the northern areas, Pakistan. Gilgit, Pakistan: Aga Khan Health Service, Pakistan 2001.
- 36 Aiga H, Arai Y, Marui E, *et al.* Impact of improvement of water supply on reduction of diarrheal incidence in a squatter area of Manila. *Environmental Health & Preventive Medicine* 1999;**4**:111-6.



- 37 Aiga H, Umenai T. Impact of improvement of water supply on household economy in a squatter area of Manila. *Social Science & Medicine* 2002;**55**:627-41.
- 38 Wolff CG, Schroeder DG, Young MW. Effect of improved housing on illness in children under 5 years old in northern Malawi: cross sectional study. *British Medical Journal* 2001;**322**:1209-12.
- 39 Chapin FS. The effects of slum clearance and rehousing on family and community relationships in Minneapolis. *American Journal of Sociology* 1938;**43**:744-63.
- 40 McGonigle G, Kirby J. Poverty, nutrition and the public health. *Poverty & Public Health*: Gillencz 1936.
